# Supplementary material for: Active Center Control of Termination by RNA Polymerase III and tRNA Gene Transcription Levels In Vivo
Source: PubMed Central journal article supplement (PMC4982682; doi:10.1371/journal.pgen.1006253), 2016-08-12

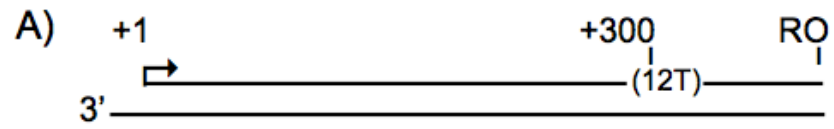

B)

|                    | yAS99 |    |   |    |    |    |    |   |    |    | yKR22 |    |    |    |    |    |    |    |    |    | Purified <i>S. cerevisiae</i> RNAP III |    | Purified <i>E. Coli</i> RNAP |    | ssDNA mol wt marker |    |    |    |    |    |    |    |    |   |   |   |   |  |  |  |  |  |
|--------------------|-------|----|---|----|----|----|----|---|----|----|-------|----|----|----|----|----|----|----|----|----|----------------------------------------|----|------------------------------|----|---------------------|----|----|----|----|----|----|----|----|---|---|---|---|--|--|--|--|--|
| Anti-Flag          | -     | -  | - | -  | -  | +  | +  | + | +  | +  | -     | -  | -  | -  | -  | +  | +  | +  | +  | +  | -                                      | -  | +                            | +  |                     | -  | -  | +  | +  | -  | -  | +  | +  | - | - | + | + |  |  |  |  |  |
| nonimmune IgG      | +     | +  | + | +  | +  | -  | -  | - | -  | -  | +     | +  | +  | +  | +  | -  | -  | -  | -  | -  | -                                      | -  | +                            | +  | -                   | -  | +  | +  | -  | -  | +  | +  | -  | - | + | + |   |  |  |  |  |  |
| 3'-tailed template | -     |    | + | +  | +  | -  | -  | + | +  | +  | -     | -  | +  | +  | +  |    |    |    |    |    | +                                      | +  | +                            | -  |                     |    |    |    |    |    |    |    |    |   |   |   |   |  |  |  |  |  |
| blunt DNA          | -     | +  | - | -  | -  | -  | +  | - | -  | -  | -     | +  | -  | -  | -  | -  | +  | -  | -  | -  | +                                      | -  | -                            | -  | -                   | +  | -  | -  | -  | +  | -  | -  |    |   |   |   |   |  |  |  |  |  |
| time (sec)         | 60    | 60 | 0 | 30 | 60 | 60 | 60 | 0 | 30 | 60 | 60    | 60 | 60 | 0  | 30 | 60 | 60 | 60 | 0  | 30 | 60                                     | 60 | 60                           | 60 | 60                  | 30 | 60 | 60 | 60 | 30 | 60 | 60 | 30 |   |   |   |   |  |  |  |  |  |
|                    | 1     | 2  | 3 | 4  | 5  | 6  | 7  | 8 | 9  | 10 | 11    | 12 | 13 | 14 | 15 | 16 | 17 | 18 | 19 | 20 | 21                                     | 22 | 23                           | 24 | 25                  | 26 | 27 | 28 | mw |    |    |    |    |   |   |   |   |  |  |  |  |  |

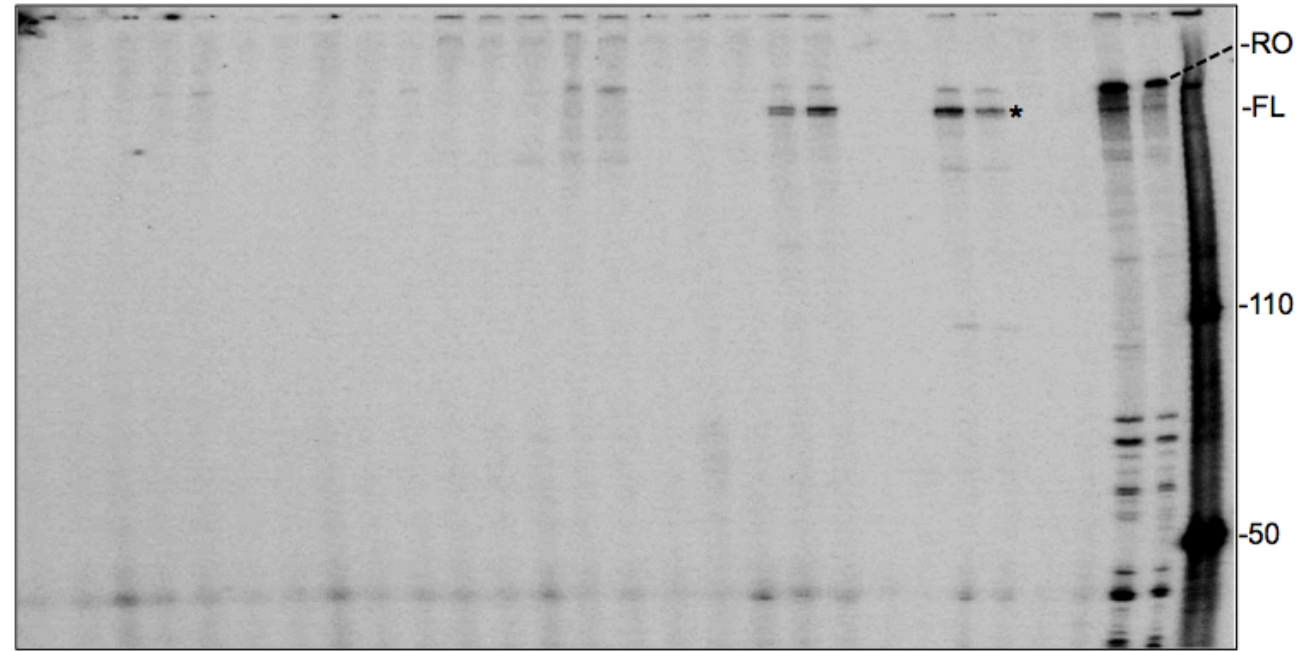

Supplement: pgen.1006253.s002.pdf [file pgen.1006253.s002.pdf]
