# Supplementary material for: Active Center Control of Termination by RNA Polymerase III and tRNA Gene Transcription Levels In Vivo
Source: PubMed Central journal article supplement (PMC4982682; doi:10.1371/journal.pgen.1006253), 2016-08-12
Supplement: pgen.1006253.s001.pdf [file pgen.1006253.s001.pdf]

## Site directed mutation at E850 position of Rpc1

yKR1 (T5 terminator)

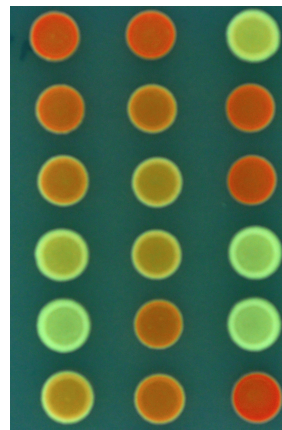

EMM Ura-, Ade10

| Rep4X | Rpc1 wt | Rpc2-T451I |
|-------|---------|------------|
| E850L | E850I   | E850F      |
| E850V | E850C   | E850Y      |
| E850A | E850T   | E850G      |
| E850S | E850D   | E850K      |
| E850N | E850H   | E850P      |

yJI1 (T6 terminator)

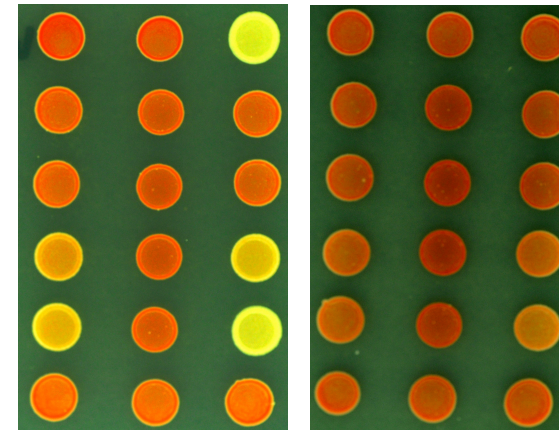

EMM Ura-, Ade10 + Thiamine

Mutation of E:

- G, S, and K has stronger suppression
- A, C, N and T has weak suppression
- Bulky group (F, Y) or Proline has no suppression

Mutation not made: R, W, M, Q
