# Supplementary material for: Active Center Control of Termination by RNA Polymerase III and tRNA Gene Transcription Levels In Vivo
Source: PubMed Central journal article supplement (PMC4982682; doi:10.1371/journal.pgen.1006253), 2016-08-12
Supplement: pgen.1006253.s003.pdf [file pgen.1006253.s003.pdf]

**Table S1. *Schizosaccharomyces pombe* strains used in this stud**

| Strain name | Genotype                                                                                         | Reference  |
|-------------|--------------------------------------------------------------------------------------------------|------------|
| yAS99       | h- ade6-704 ura4-D18 leu1-32                                                                     | [1-3]      |
| yYH1        | h- ade6-704 ura4-D18 leu1-32::[tRNAmSer7T-leu1 <sup>+</sup> ]                                    | [4]        |
| yAS68       | h- ade6-704 ura4-D18 leu1-32::[tRNAmSer3T-leu1 <sup>+</sup> ]                                    | [5]        |
| yAS70       | h- ade6-704 ura4-D18 leu1-32::[tRNAmSer4T-leu1 <sup>+</sup> ]                                    |            |
| yAS76       | h- ade6-704 ura4-D18 leu1-32::[tRNAmSer5T-leu1 <sup>+</sup> ]                                    | [6]        |
| yKR1        | h- ade6-704 ura4-D18 leu1-32::[DRT5T-leu1 <sup>+</sup> ]                                         | [6]        |
| yJI1        | h- ade6-704 ura4-D18 leu1-32::[DRT6T-leu1 <sup>+</sup> ]                                         | [5]        |
| yKR22       | h- ade6-704 ura4-D18 leu1-32::[DRT5T-leu1 <sup>+</sup> ]<br>rpc2::(rpc2-FH-KanMX6)               | this study |
| yKR101      | h- leu132::[tRNAmSer3T-leu1 <sup>+</sup> ] ura4-D18 ade6-704<br>maf1 Δ:KanMX6. (made from yAS68) | this study |

- [1]Huang Y, Bayfield MA, Intine RV, Maraia RJ. Separate RNA-binding surfaces on the multifunctional La protein mediate distinguishable activities in tRNA maturation. *Nat Struct Mol Biol.* 2006 Jul;13(7):611-8.
- [2]Iben JR, Epstein JA, Bayfield MA, Bruinsma MW, Hasson S, Bacikova D, et al. Comparative whole genome sequencing reveals phenotypic tRNA gene duplication in spontaneous *Schizosaccharomyces pombe* La mutants. *Nucleic Acids Res.* 2011 Feb 11;39:4728-42.
- [3]Intine RVA, Sakulich AL, Koduru SB, Huang Y, Pierstorff E, Goodier JL, et al. Control of transfer RNA maturation by phosphorylation of the human La antigen on serine 366. *Mol Cell.* 2000;6:339-48.
- [4]Huang Y, Intine RV, Mozlin A, Hasson S, Maraia RJ. Mutations in the RNA Polymerase III Subunit Rpc11p That Decrease RNA 3' Cleavage Activity Increase 3'-Terminal Oligo(U) Length and La-Dependent tRNA Processing. *Mol Cell Biol.* 2005;25(2):621-36.
- [5]Iben JR, Mazeika JK, Hasson S, Rijal K, Arimbasseri AG, Russo AN, et al. Point mutations in the Rpb9-homologous domain of Rpc11 that impair transcription termination by RNA polymerase III. *Nucleic Acids Res.* 2011;39:6100-13.
- [6]Rijal K, Maraia RJ. RNA polymerase III mutants in TFIIF  $\alpha$ -like C37 cause terminator readthrough with no decrease in transcription output. *Nucleic Acids Research.* 2013;41:139-55.
